# Supplementary material
Source: PubMed Central journal article supplement (PMC3678527)
Supplement: NIHMS474600-supplement-supplement_1.pdf [file NIHMS474600-supplement-supplement_1.pdf]

Supplement Table 1. Cardiac phenotype of each heterotaxy patient.

| <b>Phenotypes of the patients</b> |                                                                                                                                                                                                                                                |
|-----------------------------------|------------------------------------------------------------------------------------------------------------------------------------------------------------------------------------------------------------------------------------------------|
| <b>ID</b>                         | <b>Cardiac phenotype</b>                                                                                                                                                                                                                       |
| CHD 1                             | Interrupted inferior vena cava, atrioventricular septal defect, malrotation, transverse liver                                                                                                                                                  |
| CHD 4                             | Double outlet right ventricle, mitral atresia, malrotation                                                                                                                                                                                     |
| CHD 8                             | Bilateral superior vena cava, right ventricle dominant atrioventricular septal defect, malposed great vessels, pulmonary atresia, total anomalous pulmonary venous return, malrotation                                                         |
| CHD 11                            | Interrupted inferior vena cava, bilateral superior vena cava, common atrium, atrioventricular septal defect, pulmonary stenosis                                                                                                                |
| CHD 12                            | Left superior vena cava, atrioventricular septal defect, transposition of the great arteries, pulmonary atresia, total anomalous pulmonary venous return, malrotation, right-sided stomach, asplenia                                           |
| CHD 15                            | No right superior vena cava, unbalanced atrioventricular septal defect, double outlet right ventricle, pulmonary stenosis, transverse liver, asplenia                                                                                          |
| CHD 17                            | Left sided inferior vena cava, unbalanced atrioventricular septal defect, double outlet right ventricle, pulmonary atresia, total anomalous pulmonary venous return, transverse liver, asplenia                                                |
| CHD 19                            | Interrupted inferior vena cava, normal intracardiac anatomy, duodenal atresia, transverse liver                                                                                                                                                |
| CHD 32                            | Hepatic veins drain separately into the right atrium, right ventricle dominant atrioventricular septal defect, double outlet right ventricle, mitral atresia, total anomalous pulmonary venous return, malrotation, transverse liver, asplenia |
| CHD 34                            | Interrupted inferior vena cava, right ventricle dominant atrioventricular septal defect, pulmonary stenosis, bilaterally symmetrical pulmonary venous return, malrotation, transverse liver, polysplenia                                       |
| CHD 37                            | Interrupted inferior vena cava, right ventricle dominant atrioventricular septal defect, transposition of the great arteries, pulmonary atresia, total anomalous pulmonary venous return, malrotation                                          |
| CHD 38                            | Interrupted inferior vena cava, bilateral superior vena cava, malposed great vessels, bilaterally symmetrical pulmonary venous return, right-sided stomach, transverse liver                                                                   |
| CHD 41                            | Interrupted inferior vena cava, separate hepatic venous drainage, common atrium,                                                                                                                                                               |

|         |                                                                                                                                                                                                                                                                                        |
|---------|----------------------------------------------------------------------------------------------------------------------------------------------------------------------------------------------------------------------------------------------------------------------------------------|
|         | functionally single dominant left ventricle, malposition of the great vessels, pulmonary stenosis                                                                                                                                                                                      |
| CHD 44  | Atrioventricular septal defect, double outlet right ventricle, pulmonary stenosis, total anomalous pulmonary venous return, malrotation, transverse liver, asplenia                                                                                                                    |
| CHD 48  | Interrupted inferior vena cava, hepatic venous drainage into left-sided atrium, bilateral superior vena cava, double outlet right ventricle, pulmonary stenosis, ipsilateral pulmonary venous return, malrotation                                                                      |
| CHD 51  | Interrupted inferior vena cava, hypoplastic left side, coarctation of the aorta                                                                                                                                                                                                        |
| CHD 53  | Heart positioned in midline, double outlet right ventricle, malrotation, transverse liver, asplenia                                                                                                                                                                                    |
| CHD 59  | Interrupted inferior vena cava, atrioventricular septal defect                                                                                                                                                                                                                         |
| CHD 69  | Bilateral superior vena cava, common atrium, atrioventricular septal defect, aortic stenosis, ipsilateral pulmonary veins                                                                                                                                                              |
| CHD 71  | Left inferior vena cava, double outlet right ventricle, atrioventricular septal defect, pulmonary stenosis, total anomalous pulmonary venous return, transverse liver, right-sided stomach, asplenia                                                                                   |
| CHD 77  | Interrupted inferior vena cava, hepatic venous drainage separate into right-sided atrium, ipsilateral pulmonary venous return, malrotation, right-sided stomach, transverse liver                                                                                                      |
| CHD 82  | Interrupted inferior vena cava, right ventricle dominant atrioventricular septal defect, double outlet right ventricle, pulmonary stenosis                                                                                                                                             |
| CHD 83  | Left sided inferior vena cava, left superior vena cava, unbalanced atrioventricular septal defect, transposition of the great vessels, pulmonary atresia, partial anomalous pulmonary venous return, asplenia                                                                          |
| CHD 90  | Interrupted inferior vena cava, hepatic venous drainage left of midline, bilateral vena cava, right ventricle dominant atrioventricular septal defect, double outlet right ventricle, hypoplastic aortic arch, right-sided stomach                                                     |
| CHD 95  | Interrupted inferior vena cava, hepatic venous drainage into right-sided atrium, right ventricle dominant atrioventricular septal defect, double outlet right ventricle, pulmonary atresia                                                                                             |
| CHD 102 | Hepatic venous drainage into the common atrium on left of midline, no right superior vena cava, left superior vena cava with hemiazygos continuation, atrioventricular septal defect, functionally single ventricle, pulmonary stenosis, malrotation, right-sided stomach, polysplenia |

|         |                                                                                                                                                                                                                                                            |
|---------|------------------------------------------------------------------------------------------------------------------------------------------------------------------------------------------------------------------------------------------------------------|
| CHD 103 | Left superior vena cava, no right superior vena cava, hepatic venous drainage separate into right-sided atrium, right ventricle dominant atrioventricular septal defect, coarctation of the aorta                                                          |
| CHD 116 | Bilateral vena cava, right ventricle dominant atrioventricular septal defect, total anomalous pulmonary venous return, double outlet right ventricle                                                                                                       |
| CHD 131 | Bilateral superior vena cava, right ventricle dominant atrioventricular septal defect, double outlet right ventricle, pulmonary stenosis, polysplenia                                                                                                      |
| CHD 141 | Inferior vena cava to base of common atrium, bilateral superior vena cava, right ventricle dominant atrioventricular septal defect, pulmonary atresia, ipsilateral pulmonary venous return                                                                 |
| CHD 149 | Double outlet right ventricle, right ventricle dominant atrioventricular septal defect, pulmonary atresia, total anomalous pulmonary venous return, asplenia                                                                                               |
| CHD 154 | Interrupted inferior vena cava, atrial septal defect                                                                                                                                                                                                       |
| CHD 186 | Hepatic venous drainage to midline of right-sided atrium, bilateral vena cava, atrioventricular septal defect, pulmonary atresia, total anomalous pulmonary venous return, malrotation                                                                     |
| CHD 189 | Interrupted inferior vena cava, common atrium, atrioventricular septal defect, ipsilateral pulmonary venous return, right-sided stomach                                                                                                                    |
| CHD 198 | Interrupted inferior vena cava                                                                                                                                                                                                                             |
| CHD 204 | Left-sided inferior vena cava, bilateral superior vena cava, common atrium, upstairs-downstairs ventricles, right-sided stomach, transverse liver, polysplenia                                                                                             |
| CHD 437 | Interrupted inferior vena cava, double outlet right ventricle, right ventricle dominant atrioventricular septal defect, malrotation                                                                                                                        |
| CHD655  | Ventricular septal defect, malrotation, polysplenia                                                                                                                                                                                                        |
| CHD678  | Bilateral superior vena cava, transposition of the great arteries, pulmonary atresia, ventricular septal defect, asplenia, right sided stomach and transverse liver                                                                                        |
| CHD 707 | Interrupted inferior vena cava, aortic valve hypoplasia, right sided stomach                                                                                                                                                                               |
| CHD 765 | Hepatic veins drain to the right side of the common atrium, interrupted inferior vena cava, left superior vena cava, absent right superior vena cava, common atrium, atrioventricular septal defect, transposition of the great vessels, pulmonary atresia |
| CHD 770 | Interrupted inferior vena cava                                                                                                                                                                                                                             |
| CHD 880 | Interrupted inferior vena cava, atrioventricular septal defect                                                                                                                                                                                             |

|            |                                                                                                                                                                                                     |
|------------|-----------------------------------------------------------------------------------------------------------------------------------------------------------------------------------------------------|
| CHD 907    | Right ventricle dominant atrioventricular septal defect, mitral atresia, aortic valve atresia, aortic hypoplasia                                                                                    |
| CHD1067    | Interrupted inferior vena cava, atrioventricular septal defect, transposition of the great arteries, right sided stomach                                                                            |
| CHD 1142AF | Malposed great arteries with an anterior, hypoplastic pulmonary artery, right ventricle dominant atrioventricular septal defect, left AV valve atresia, total anomalous pulmonary venous return     |
| CHD 1169   | Bilateral superior vena cava, right ventricle dominant atrioventricular septal defect, double outlet right ventricle, pulmonary stenosis, total anomalous pulmonary venous return, transverse liver |
